# Supplementary material for: Simultaneous electrodeposition of manganese oxide/poly(o-aminophenol) composites as electrode materials for aqueous electrochemical energy storage
Source: Royal Society of Chemistry journal article supplement (doi:10.1039/d5tc00814j), 2025-01-01
Supplement: d5tc00814j1.pdf [file d5tc00814j1.pdf]

## Supporting Information

### **Simultaneous electrodeposition of manganese oxide/poly(o-aminophenol) composites as the electrode material for aqueous electrochemical energy storage**

Shaotong Pei<sup>a,\*</sup>, Bo Lan<sup>a</sup>, Xueting Bai<sup>a</sup>, Yunpeng Liu<sup>a</sup>, Xinlan Yi<sup>b</sup>,  
Haichao Sun<sup>a</sup>, Weiqi Wang<sup>a</sup>, Mianxiao Wu<sup>a</sup>, Chao Wang<sup>c,d,\*</sup>

*a. Hebei Provincial Key Laboratory of Power Transmission Equipment  
Security Defense, North China Electric Power University, Baoding,  
Hebei 071003, China*

*b. Economic management Department, North China Electric Power  
University, Baoding, Hebei 071003, China*

*c. School of Renewable Energy, Inner Mongolia University of  
Technology, Ordos, Inner Mongolia 017010, China*

*d. Inner Mongolia Key Laboratory of New Energy and Energy Storage  
Technology, Hohhot 010051, China*

Corresponding authors:

peishaotong@ncepu.edu.cn

cwang@imut.edu.cn

## **Contents**

- 1. Experimental**
- 2. Electrochemistry**
- 3. XPS**
- 4. SEM**
- 5. Comparison of specific capacity and cyclic stability**
- 6. References**

## 1. Experimental

### Chemicals

The following reagents were used without further purification: Manganese sulfate ( $\text{MnSO}_4 \cdot \text{H}_2\text{O}$ , AR, 99.0%, FuChen (Tianjin) Chemical Reagents Co., Ltd.), *o*-aminophenol ( $\text{C}_6\text{H}_7\text{NO}$ , AR, 99%, Shanghai Aladdin Biochemical Technology Co., Ltd.), concentrated sulfuric acid ( $\text{H}_2\text{SO}_4$ , AR, 98.0%, Shanghai HaoHong Bio-Pharmaceutical Technology Co., Ltd.), zinc sulfate ( $\text{ZnSO}_4$ , AR, 99.8%, Shanghai HaoHong Bio-Pharmaceutical Technology Co., Ltd.), potassium chloride (KCl, AR, 99.5%, FuChen (Tianjin) Chemical Reagents Co., Ltd.), potassium ferricyanide ( $\text{K}_3[\text{Fe}(\text{CN})_6]$ , AR, 99.5%, Tianjin RuiJinTe Chemicals Co., Ltd.), ammonium sulfate ( $(\text{NH}_4)_2\text{SO}_4$ , AR, 99.1%, Shanghai BiDe Pharmaceutical Technology Co., Ltd.), carbon cloth (SCC130, Suzhou ShengErNuo Technology Co., Ltd.) and doubly distilled water.

### Instrumentation

X-ray photoelectron spectroscopy was performed on Shimadzu/Krayos AXIS Ultra DLD at room temperature and ultra-high vacuum (UHV) conditions. The full-spectrum acquisition voltage was 15 kV, filament current was 5 mA, and the test pass energy Pass Energy was 160eV; the fine-spectrum voltage was 15 kV, filament current was 10 mA, and the test pass energy Pass Energy was 40eV. Charge correction was performed using C 1s=284.80 eV binding energy as the energy standard. X-ray diffraction (XRD) was performed on X-ray powder diffractometer (Rigaku SmartLab SE, Japan) equipped with a Cu target ( $\lambda = 0.154 \text{ nm}$ ). Field emission scanning electron microscope (ZEISS Sigma 300, Germany) equipped with electron diffraction spectroscopy was used to observe the morphology and elemental distribution of the film.

### Electrochemistry

The electrochemical measurements are carried out at room temperature using CHI760E electrochemical workstation, and EIS was recorded in the frequency range of  $10^6$  to 0.01 Hz under potential amplitude 5 mV. The specific capacity ( $C$ ,  $\text{mAh g}^{-1}$ ) was calculated from the discharge branch of the GCD curve by the following formula.

$$C_{S,GCD} = \frac{It}{m} \quad (1)$$

Where  $I$  (mA) is the discharge current,  $t$  (h) is the discharge time, and  $m$  (g) is the mass of the active material on the electrode. The specific capacity ( $C$ ,  $\text{mAh g}^{-1}$ ) is also calculated based on the integrated charge ( $Q$ , C) obtained from the CV cathodic scan by the following formula.

$$C_{S,CV} = \frac{Q}{3.6m} \quad (2)$$

The capacitance of the  $\text{MnO}_x/\text{PoAP}$  two-electrode energy storage system was calculated from the GCD curve using Equation (3).

$$C_{cell} = \frac{It}{2m \times \Delta V} \quad (3)$$

Where  $C_{cell}(\text{F g}^{-1})$  is the specific capacity based on the mass of electrochemically active material,

I is the current in A, and  $\Delta V(V)$  is the potential window.

The energy density and power density of the solid-state supercapacitor were calculated using Equations (4) and (5).

$$E = \frac{1}{2 \times 3.6 \times 2m} \int_0^t V dt \quad (4)$$

$$P = \frac{E \times 3600}{t} \quad (5)$$

where  $E (Wh\ kg^{-1})$  and  $P (W\ kg^{-1})$  correspond to energy density and power density, respectively.

## 2. Electrochemistry

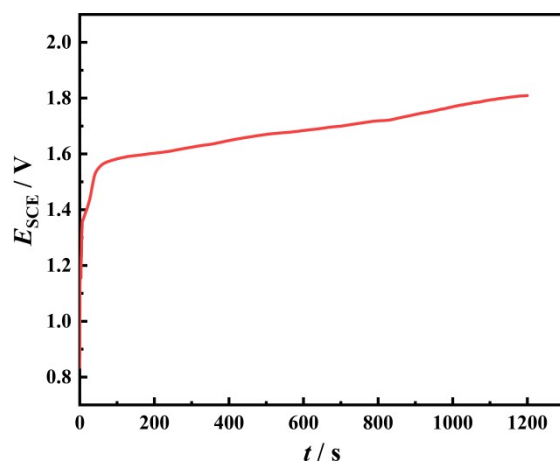

**Figure S1.**  $E - t$  curve for electropolymerization in 10 mM  $\text{MnSO}_4 + 1 \text{ mM PoAP} + 1 \text{ M H}_2\text{SO}_4$  at  $0.014 \text{ A cm}^{-2}$ . The working electrode is CC.

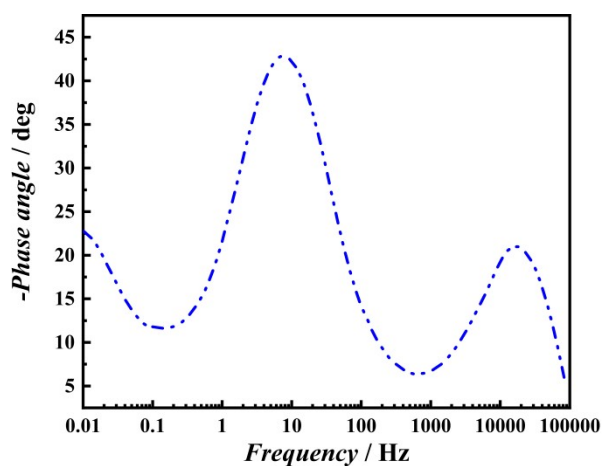

**Figure S2.** Bode plot of symmetric supercapacitor with 2 M  $(\text{NH}_4)_2\text{SO}_4$  aqueous electrolyte.

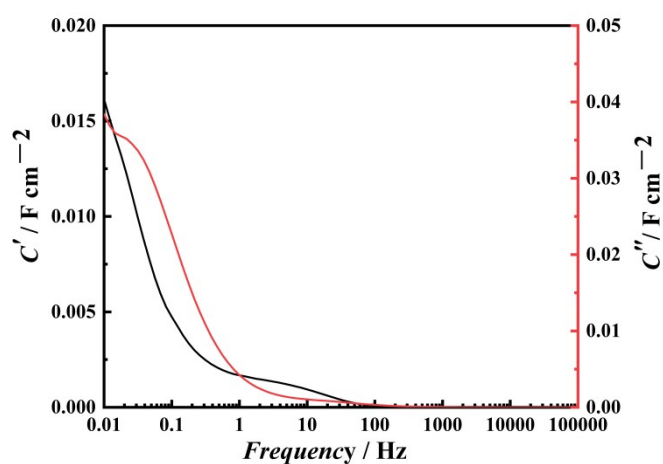

**Figure S3.** Plots of  $C'$  and  $C''$  vs.  $f$  of the symmetric supercapacitor with 2 M  $(\text{NH}_4)_2\text{SO}_4$  aqueous electrolyte.

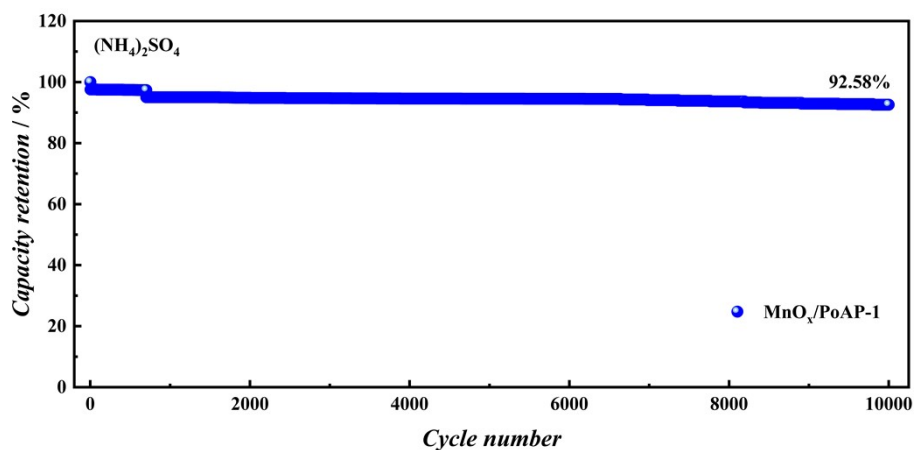

**Figure S4.** The cycling stability of  $\text{MnO}_x/\text{PoAP-1}$  at  $10 \text{ A g}^{-1}$  in  $2 \text{ M } (\text{NH}_4)_2\text{SO}_4$ .

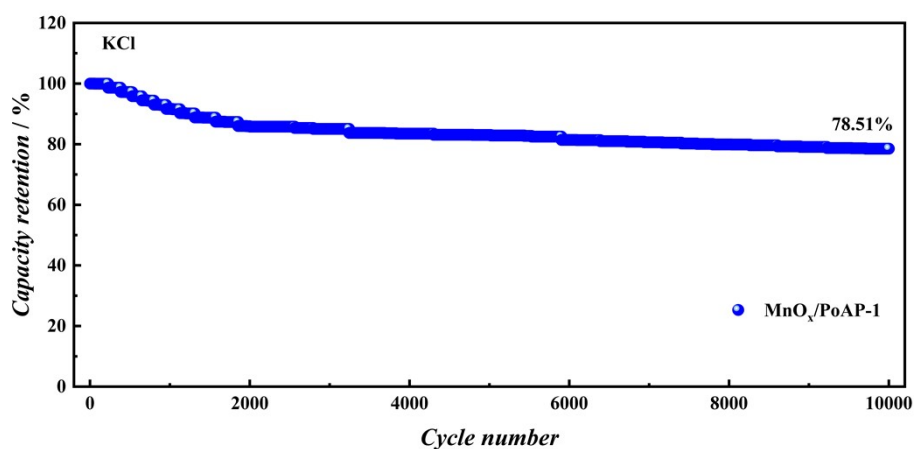

**Figure S5.** The cycling stability of  $\text{MnO}_x/\text{PoAP-1}$  at  $10 \text{ A g}^{-1}$  in  $2 \text{ M KCl}$ .

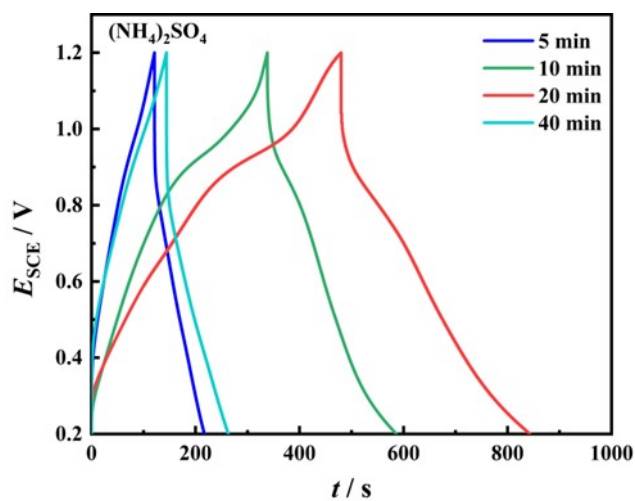

**Figure S6.** GCD profiles of  $\text{MnO}_x/\text{PoAP}$  obtained by electrochemical deposition at different times for  $14 \text{ mAcm}^{-2}$ .

### 3. XPS

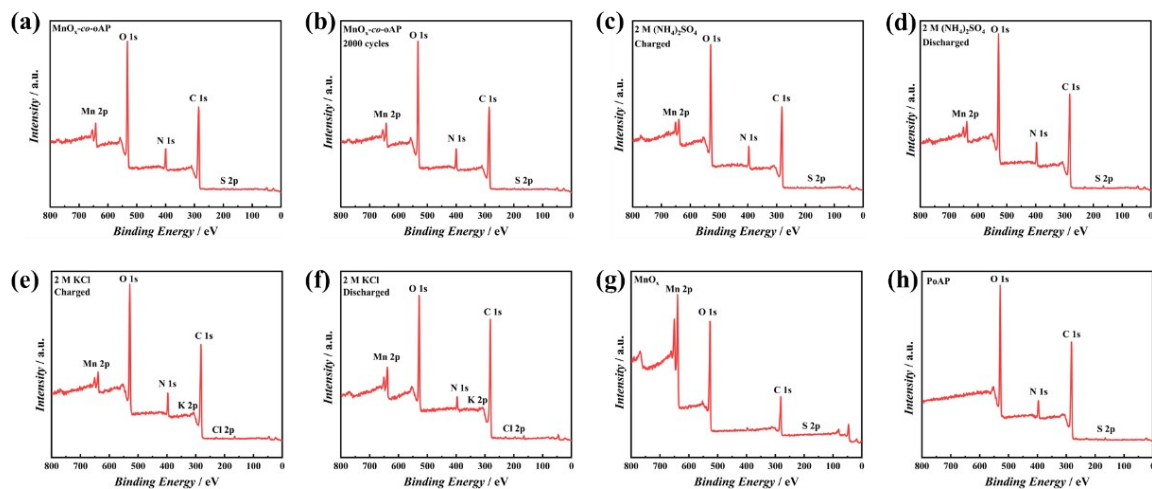

**Figure S7.** (a) XPS survey spectrum of the  $\text{MnO}_x/\text{PoAP-1}$ ; XPS survey spectrum of the  $\text{MnO}_x/\text{PoAP-1}$  under various conditions (b) after charge-discharge 2000 cycles in 2 M  $(\text{NH}_4)_2\text{SO}_4$  (c) Charged to 1.2  $V_{\text{SCE}}$  in 2 M  $(\text{NH}_4)_2\text{SO}_4$  (d) Discharged to 0.2  $V_{\text{SCE}}$  in 2 M  $(\text{NH}_4)_2\text{SO}_4$  (e) Charged to 1.0  $V_{\text{SCE}}$  in 2 M KCl (f) Discharged to  $-0.5 V_{\text{SCE}}$  in 2 M KCl; XPS survey spectrum of the (g)  $\text{MnO}_x$  and (h) PoAP.

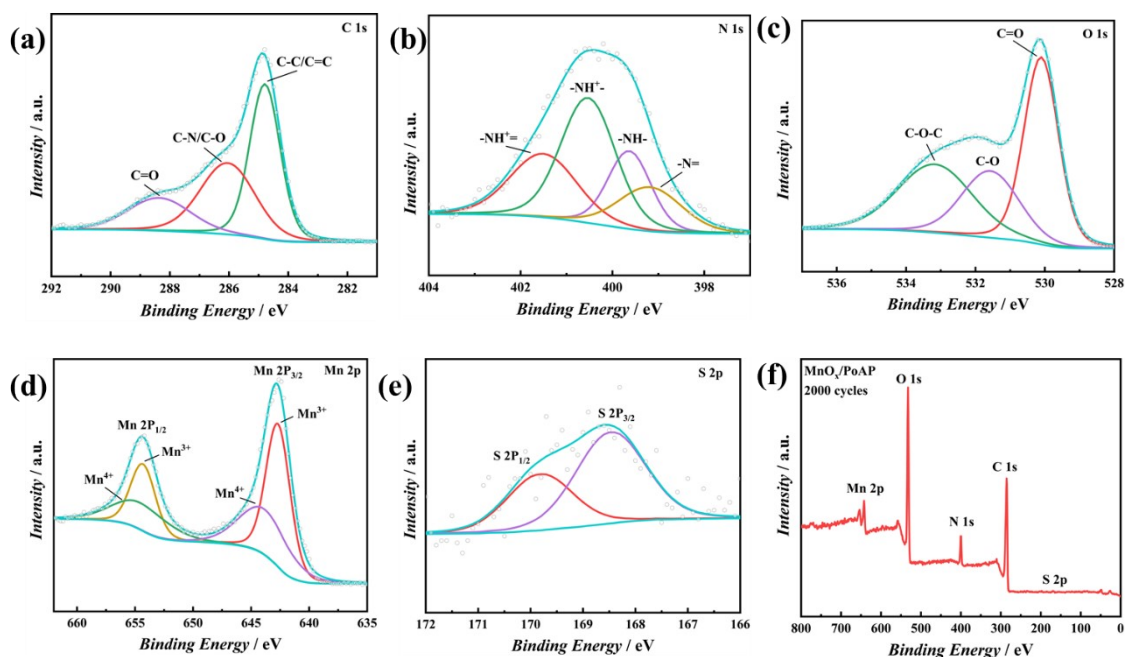

**Figure S8.** Deconvoluted high-resolution XPS spectra of the (a) C 1s region; (b) N 1s region; (c) O 1s region; (d) S 2p region; (e) Mn 2p region of the as-deposited  $\text{MnO}_x/\text{PoAP}$ ; (f) after charge-discharge 2000 cycles in 2 M  $(\text{NH}_4)_2\text{SO}_4$ .

**Table S1.** Components of the deconvoluted C 1s XPS spectra of the MnO<sub>x</sub>/PoAP-1.

|                                    | 284.65 eV | 286.15 eV | 288.39 eV |
|------------------------------------|-----------|-----------|-----------|
|                                    | C-C/C=C   | C-N/C-O   | C=O       |
| 1 M H <sub>2</sub> SO <sub>4</sub> | 37.83     | 45.05     | 17.12     |

**Table S2.** Components of the deconvoluted N 1s XPS spectra of the MnO<sub>x</sub>/PoAP-1.

|                                    | 399.40 eV | 400.14 eV | 400.80 eV          | 401.67 eV          |
|------------------------------------|-----------|-----------|--------------------|--------------------|
|                                    | -N=       | -NH-      | -NH <sup>+</sup> - | -NH <sup>+</sup> = |
| 1 M H <sub>2</sub> SO <sub>4</sub> | 30.86     | 36.33     | 21.53              | 11.28              |

**Table S3.** Components of the deconvoluted O 1s XPS spectra of the MnO<sub>x</sub>/PoAP-1.

|                                    | 532.16 eV | 533.33 eV | 534.17 eV |
|------------------------------------|-----------|-----------|-----------|
|                                    | C=O       | C-O       | C-O-C     |
| 1 M H <sub>2</sub> SO <sub>4</sub> | 72.38     | 14.46     | 13.17     |

**Table S4.** Components of the deconvoluted Mn 2p XPS spectra of the MnO<sub>x</sub>/PoAP-1.

|                                    | 642.17 eV        | 644.97 eV        | 653.76 eV        | 654.70 eV        |
|------------------------------------|------------------|------------------|------------------|------------------|
|                                    | Mn <sup>3+</sup> | Mn <sup>4+</sup> | Mn <sup>3+</sup> | Mn <sup>4+</sup> |
| 1 M H <sub>2</sub> SO <sub>4</sub> | 46.75            | 22.49            | 16.92            | 13.84            |



**Table S5.** Components of the deconvoluted N 1s XPS spectra of the MnO<sub>x</sub>/PoAP-1 charged or discharged in different solutions.

|                                                       | 399.51 eV | 400.03 eV | 400.70 eV              | 401.12 eV              |
|-------------------------------------------------------|-----------|-----------|------------------------|------------------------|
|                                                       | -N= (%)   | -NH- (%)  | -NH <sup>+</sup> - (%) | -NH <sup>+</sup> = (%) |
| <b>2 M (NH<sub>4</sub>)<sub>2</sub>SO<sub>4</sub></b> |           |           |                        |                        |
| <b>Charged</b>                                        | 19.86     | 29.51     | 37.07                  | 13.55                  |
| <b>2 M (NH<sub>4</sub>)<sub>2</sub>SO<sub>4</sub></b> |           |           |                        |                        |
| <b>Discharged</b>                                     | 2.58      | 57.03     | 34.68                  | 5.71                   |
| <b>2 M KCl</b>                                        |           |           |                        |                        |
| <b>Charged</b>                                        | 4.08      | 7.3       | 54.92                  | 33.7                   |
| <b>2 M KCl</b>                                        |           |           |                        |                        |
| <b>Discharged</b>                                     | 15.41     | 48.71     | 27.91                  | 7.97                   |

**Table S6.** Components of the deconvoluted O 1s XPS spectra of the MnO<sub>x</sub>/PoAP-1 charged or discharged in different solutions.

|                                                       | 530.10 eV | 532.10 eV | 533.51 eV | 534.21 eV |
|-------------------------------------------------------|-----------|-----------|-----------|-----------|
|                                                       | Mn-O-Mn   | C=O/Mn-OH | C-O (%)   | C-O-C (%) |
|                                                       | (%)       | (%)       |           |           |
| <b>2 M (NH<sub>4</sub>)<sub>2</sub>SO<sub>4</sub></b> |           |           |           |           |
| <b>Charged</b>                                        | 7.64      | 50.48     | 27.86     | 14.02     |
| <b>2 M (NH<sub>4</sub>)<sub>2</sub>SO<sub>4</sub></b> |           |           |           |           |
| <b>Discharged</b>                                     | 3.64      | 56.94     | 31.54     | 7.88      |
| <b>2 M KCl</b>                                        |           |           |           |           |
| <b>Charged</b>                                        | 15.49     | 42.19     | 30.73     | 11.59     |
| <b>2 M KCl</b>                                        |           |           |           |           |
| <b>Discharged</b>                                     | 4.77      | 43.76     | 36.94     | 14.53     |

**Table S7.** Components of the deconvoluted N 1s XPS spectra of the MnO<sub>x</sub>/PoAP-1 charged or discharged in different solutions.

|                                                       | <b>642.33 eV</b>           | <b>644.83 eV</b>           | <b>654.12 eV</b>           | <b>655.71 eV</b>           |
|-------------------------------------------------------|----------------------------|----------------------------|----------------------------|----------------------------|
|                                                       | <b>Mn<sup>3+</sup> (%)</b> | <b>Mn<sup>4+</sup> (%)</b> | <b>Mn<sup>3+</sup> (%)</b> | <b>Mn<sup>4+</sup> (%)</b> |
| <b>2 M (NH<sub>4</sub>)<sub>2</sub>SO<sub>4</sub></b> |                            |                            |                            |                            |
| <b>Charged</b>                                        | 48.06                      | 18.41                      | 19.5                       | 14.03                      |
| <b>2 M (NH<sub>4</sub>)<sub>2</sub>SO<sub>4</sub></b> |                            |                            |                            |                            |
| <b>Discharged</b>                                     | 48.39                      | 22.04                      | 26.32                      | 3.25                       |
| <b>2 M KCl</b>                                        |                            |                            |                            |                            |
| <b>Charged</b>                                        | 39.47                      | 25.97                      | 9.72                       | 24.83                      |
| <b>2 M KCl</b>                                        |                            |                            |                            |                            |
| <b>Discharged</b>                                     | 45.09                      | 25.26                      | 17.44                      | 12.21                      |

#### 4. SEM

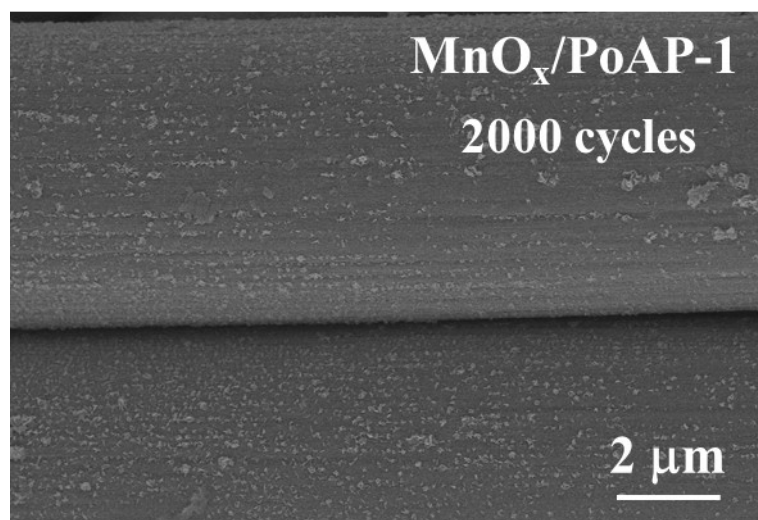

**Figure S9.** The SEM images of the MnO<sub>x</sub>/PoAP-1 after GCD cycling at 10 A g<sup>-1</sup> for 2000 cycles in 2 M (NH<sub>4</sub>)<sub>2</sub>SO<sub>4</sub>.

## 5. Comparison of specific capacity and cyclic stability

**Table S8.** Comparison of specific capacity and cycling stability of conducting polymer/metal oxide composites.

| <i>Material</i>                                               | <i>Electrolyte</i>                                  | <i>Specific capacity</i>                  | <i>Cyclic stability</i>      | <i>Ref.</i> |
|---------------------------------------------------------------|-----------------------------------------------------|-------------------------------------------|------------------------------|-------------|
| <b>MnO<sub>x</sub>/PoAP</b>                                   | 2 M (NH <sub>4</sub> ) <sub>2</sub> SO <sub>4</sub> | 100.88 mAh                                | 92.58% after                 | This work   |
|                                                               |                                                     | $g^{-1}$ at 1 A $g^{-1}$                  | 10000 cycles                 |             |
|                                                               | 2 M KCl                                             | 166.94 mAh $g^{-1}$<br>at 1 A $g^{-1}$    | 78.51% after<br>10000 cycles |             |
| <b>MnO<sub>x</sub>(AAIC)</b>                                  | 2 M (NH <sub>4</sub> ) <sub>2</sub> SO <sub>4</sub> | 175 F $g^{-1}$ at 1<br>A $g^{-1}$         | 89% after 1000<br>cycles     | [1]         |
| <b><math>\alpha</math>-<br/>MnO<sub>2</sub>/PANI/rG<br/>O</b> | 0.5 M H <sub>2</sub> SO <sub>4</sub>                | 77 F $g^{-1}$ at 1<br>mA cm <sup>-2</sup> | 75% after 2000<br>cycles     | [2]         |
| <b>V<sub>2</sub>O<sub>5</sub>@PPy</b>                         | 1 M Na <sub>2</sub> SO <sub>4</sub>                 | 307 F $g^{-1}$ at 1<br>A $g^{-1}$         | 82% after 1000<br>cycles     | [3]         |

## **6. References**

- [1] S. G. Krishnan, H. D. Pham, C. Padwal, H. Weerathunga, X. Wang, K. Mahale and D. Dubal, *Journal of Power Sources*, 2023, 570, 232994.
- [2] P. H. Patil, V. V. Kulkarni, T. D. Dongale and S. A. Jadhav, *Journal of Composites Science*, 2023, 7, 167.
- [3] Y. Liang, Z. Wei, X. Zhang and R. Wang, *ES Energy & Environment*, 2022, 18, 101-110.
